## RESEARCH ARTICLE

## COVID-19 pandemic and unemployment rate prediction for developing countries of Asia: A hybrid approach

Lumin Shi<sup>1,2</sup>, Yousaf Ali Khan<sup>3\*</sup>, Man-Wen Tian<sup>4</sup>

**1** Business School, Lishui University, Lishui, Zhejiang, China, **2** Philippine Christian University, Manila, Philippines, **3** Department of Mathematics and Statistics, Hazara University Mansehra, Mansehra, Pakistan, **4** National Key Project Laboratory, Jiangxi University of Engineering, Xinyu, China

\* [yousaf\\_hu@yahoo.com](mailto:yousaf_hu@yahoo.com)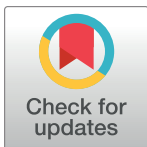

## Abstract

Unemployment is an essential problem for developing countries, which has a direct and major role in economy of a country. Understanding the patterns of unemployment rate is critical now a days and has drawn attention of researcher from all fields of study across the globe. As unemployment plays an important role in the planning of a country's monetary progress for policymakers and researcher. Determining the unemployment rate efficiently required an advance modeling approach. Recently, numerous studies have relied on traditional testing methods to estimate the unemployment rate. Unemployment is usually nonstationary in nature. As a result, demonstrating them using traditional methods will lead to unpredictable results. It needs a hybrid approach to deal with the prediction of unemployment rate in order to deal with the issue associated with traditional techniques. This research primary goal is to examine the effect of the Covid-19 pandemic on the unemployment rate in selected countries of Asia through advanced hybrid modeling approach, using unemployment data of seven developing countries of Asian: Iran, Sri Lanka; Bangladesh; Pakistan; Indonesia; China; and India, and compare the results with conventional modeling approaches. Finding shows that the hybrid ARIMA-ARNN model outperformed over its competitors for Asia developing economies. In addition, the best fitted model was utilised to predict five years ahead unemployment rate. According to the findings, unemployment will rise significantly in developing economies in the next years, and this will have a particularly severe impact on the region's economies that aren't yet developed.

## OPEN ACCESS

**Citation:** Shi L, Khan YA, Tian M-W (2022) COVID-19 pandemic and unemployment rate prediction for developing countries of Asia: A hybrid approach. PLoS ONE 17(12): e0275422. <https://doi.org/10.1371/journal.pone.0275422>

**Editor:** Ricky Chee Jiun Chia, Universiti Malaysia Sabah, MALAYSIA

**Received:** February 23, 2021

**Accepted:** September 18, 2022

**Published:** December 1, 2022

**Copyright:** © 2022 Shi et al. This is an open access article distributed under the terms of the [Creative Commons Attribution License](https://creativecommons.org/licenses/by/4.0/), which permits unrestricted use, distribution, and reproduction in any medium, provided the original author and source are credited.

**Data Availability Statement:** Data used in this research is available online at: FRED Economic Data. The details about the data used in this research along with the links are: <https://fred.stlouisfed.org/series/UNRATENSA>. Furthermore, the data can be accessed by going to <https://fred.stlouisfed.org>, select "unemployment," then select the "country" for which the data is required, and then select "monthly". Data from January 1948 to August 2022 is available.

**Funding:** This work was financially supported by the Key Project of the National Social Science

## 1. Introduction

To evaluate financial models and select reasonable venture tactics, monetary benefactors utilise company data and financial estimates, such as total national output. To put it another way, the unemployment rate converts into an appropriate monetary indicator for every country because of its connection to the state yield plan and the influence it has on monetary policy [1]. An organisation takes very specific efforts to ensure that its monetary concerns are properly managed and formalises a framework for doing so. Beginning in the mid-1990s, research

Foundation under Grant No.(18AJY013). Furthermore, the funders had no role in study design, data collection and analysis, decision to publish, or preparation of the manuscript.

**Competing interests:** The authors have declared that no competing interests exist.

**Abbreviations:** ACF, Autocorrelation Function; AIC, Akaike information criterion; ANN, Artificial neural networks (ANN); ARIMA, Autoregressive Integrated Moving Average; ARNN, Autoregressive Neural Network; BIC, Bayesian information criterion; COVID-19, Corona Virus Pandemic; MAE, Mean Absolute Error; MAPE, Mean Absolute Percent Error; PACF, Partial Autocorrelation Function; RMSE, Root Mean Square Error; SVM, Support Vector Machine.

on the unemployment rate and macroeconomics flourished in anticipation. For the evaluation of macroeconomic components, a couple of time series models [2] were examined. There is a crucial time-game plan that displays the diversity across direct data age achievement with scattered variations in constancy. This study's goal is to determine the number of unemployed people in Asia after the cunning coronavirus pandemic wipes off the population in developing countries. The current deplorable state of affairs is completely out of character for conditions that prevailed just ten years ago [3]. The latest far-reaching catastrophe began in the monetary division and drove the rest of the economy into a startlingly postponed season of reduced credit, money-related viewpoint and full income.

The Coronavirus pandemic is the world's most serious humanitarian crisis since World War II. It has affected every country on the world, no matter how little or large their population may be. There has been a delay in the conclusion of the Covid issue due to the expansion of lockdowns and societal unrest caused by the admitted state of chaos. Such complaints as Coronavirus, which has several uses, might transfer occasional financial and money-related uses to the standard and ordinary economies [4]. This framework, on the whole, covers approximately 10% of the business; nonetheless, certain Southern Europeans [5] are under time pressure to leave their own countries. It's been determined by the IMF that global progress will fall to -3% in 2020. The EU's total national production shrank by 3.5% in the first quarter [6]. The unemployment rate in OECD countries has risen from 5.4 percent to 9.2 percent since the crisis began. The unemployment rate might rise to 12.6%, however, if a second convergence of disturbing impact affects generally held financial associations and all capital structures [7].

The epidemic has also sparked a global financial crisis that is unlike any other in recent memory, and the effects of which will be felt for many years to come. Monetary disaster in 2021 will be more visible than in 2009 [8], when there was a monetary emergency. Spring 2020 Money-related Guess of the European Commission reveals a substantial reduction in the EU nations' total public yield this year: by less than 7% for the EU as everything should be done and loosened to less than 10% in Poland, Italy, France, and Spain [9]. In addition, a number of scientists are now investigating the effects of corovana infection. in a 623 pandemic-affected location in India, the role of environmental variables in carrying the Coronavirus danger on provincial and metropolitan populations was examined [10]. Trouble shooting, work, and improvement are all receiving their own sections in the Covid. As the epidemic spreads, the number of unemployed people will rise, further aggravating the situation. To prosper in the post-pandemic climate, it would be necessary to ensure their agents and maintain business practices [11–13]. Most countries will see an increase in employment until 2019 and a reduction in that number by 2020, which reflects the effects of the present epidemic. Malaysia, Pakistan, and Indonesia, to name a few, have greater unemployment rates than other countries that have withdrawn. Unemployment in Asian-dominated regions is expected to rise to 14% by the year 2020 [14, 15]. According to experts, the Covid epidemic will continue to pose a threat to the lives of untold numbers of people, perhaps causing enormous blockage in a united global economy (Warwick, 2020). The final estimates for transitory unemployment in Singapore increased by 65,000 individuals (or +0.33 unemployment rate centres) in the city-state. In July 2020, 60% of China's unexpectedly large inflows of unemployed people were realised due to the main factors. The employing edge spoke from the edge of the bundle to an additional 79% of the unemployment rate. The existing conditions, such as processes for a limited variety of employment, aren't sufficient to reject a true decline in labour markets [16–18]. For example, such activities have the guideline time-plan repercussion of running counter to some clear data producing stages of progressions that are broadcast.

There is a reasonable ARIMA time series model to assess the level of unemployment in Bangladesh [11, 13, 19]. Various Asian countries used anticipated information sets [16, 20, 21] and

out-of-test gauges for Canadian unemployment rates [22], demonstrating the ARIMA model's value and feasibility. The situation was in any event imperceptibly erratic when compared to the US unemployment rate. TAR, an old-style, non-straight time plan model, avoided models of direct time game-plans to keep the US unemployment rate from running out of data [23]. Direct models are evaded by non-straight models [24, 25] for the transitory assessment of irregularly changing US unemployment statistics records from month to month. Improvements in the field of current assessments and PC-based insight have equipped the markers with non-straight estimate instruments, including, for example, Artificial Neural Association (ANN), Supervised Learning and Support Vector Machines (SVM) [26, 27]. For the United States, Canada, the Bound together Domain, France, and Japan, ANN is mostly used to measure unemployment rather than a contradictory money-related time [28, 29]. According to previous findings, non-random models are well-suited to longer evaluation horizons because of their ability to capture unemployment rate time course of action unevenness [30]. The unemployment rate has historically been reported in an asymmetrical manner, and this will undoubtedly continue [31].

When it comes to forecasting non-linear time series, the typical ARIMA model is terrible, but Artificial Neural Networks have recently shown excellent results. Rise of artificial intelligence increases present-day cataloging capacity and opens the door to new, vexing use cases one of the most well-known exploration areas in the advanced era of enormous information is the usage of astute based hybrid methods for large big data [32]. Soft reasoning was used to add up the reactions of a few expectation models, working on the final projection by wonderfully connecting the module yields. In the time spent deciding on a final forecast, soft reasoning takes care of the vulnerability. To match the Coronavirus data for Heilongjiang province in China, researchers tweaked a traditional differential condition model. For developing nations, [8, 33] presented a clever hybrid prediction technique that used a mixture of hypothetical concepts and soft reasoning. The inventor was able to assess the complexity of the non-random behaviour of Covid time series for various countries using the numerical meaning of the hybrid approach. [32] developed a new calculating method based on artificial neural networks. Furthermore, [34] suggested using an autoregressive neural organisation method. Extricate strategy checks serve as data sources for an ARNN [35]. Less randomness and simpler interpretation are two advantages over the ANN plan [36] that this strategy provides. Close data records provide both direct and non-straight examples in the recent worry about evaluating the unemployment rate. It's critical that policymakers stay focused on a single model in order to witness a discontinuous shift in the overall behaviour of unemployment rates. Segment models' propensity and change in assumption goof can be reduced by combining instantaneous and non-straight models [37]. As per this, a blend of immediate and non-direct models is utilized for the particular model of such confounded auto-affiliation structures [38, 39]. Previous models were used to deal with various assessment difficulties in the insurance exchange, money-related econometrics, control, contamination-causing assessment and different application zones [40–43]. The combination of ARIMA-ARNN is the strongest guide for unemployment during the disproportionate market cycle for European countries [44, 45]. These above-mentioned mixing models are crucial in attempting to resolve verifiable measurement difficulties over the long term.

This study's main goal is to investigate the connection between the direct and non-straight component of the unemployment rate's time series using innovative crossover methods. Direct and non-straight sections of the provided series are expected to be separately shown by distinct models as part of the mix approach, which retains a particularly strong link between them. By then, the results will be combined. When looking at the nonlinear nature of this time game plan, hybrid approaches are more suited for examining the varying unemployment rate

patterns. The time series is extended out to an ARIMA model in half-breed models. The left-overs from the fitted ARIMA model are also shown using contemporary AI techniques to achieve excellent expectation accuracy. This is followed by the use of non-direct models such as ARIMA's evaluated arbitrariness errors and ANN, SVM, and ARNN to display non-straight instances in the information gathering. This investigation develops a strong method to cross-country demonstrating and is used to estimate future unemployment rates.

The remainder of this study is organised in the following manner. Section 2 presents a description of the unemployment rate data set for several developing nations, as well as planned techniques for analysing the data. Section 3 discusses the hybrid modelling techniques that have been developed. When it comes to policy implementation, Section 4 demonstrates the application of the suggested hybrid method to real data sets, and Section 5 closes this research with policy recommendations.

## 2. Research methodology

As a level of the economy, the unemployment rate refers to the measure of unemployment. The valuation of unemployment rate can be described as the comprehensive prize as a work-force level for the measure of jobless individuals. In this study, seven sessionally changed month to month time series information on unemployment rates were used for Pakistan, Iran, China, Bangladash, India, Sirlanka and Indonesia. The depiction of unemployment rate informational indexes are introduced in Table 1 underneath for every chose country.

Fig 1a–1g shows the time plots for several emerging countries. There is non-stationarity and non-linearity in the data, which is supported by the unemployment rate's visualisation. It covers the broadest range of nonlinearity, thus we applied a linearity test to confirm its validity [45]. For all seven sets of findings, the linearity test strongly contradicts our linearity hypothesis.

In this investigation, we estimate unemployment rate using only one variable: the number of unemployed people. Some of the usual deviations from conventionality and nonlinearity in the data organisation may be seen in these time series, as evidenced by previous studies [25, 26, 31, 46, 47]. In the beginning, the non-linearity was obtained using the direct ARIMA model. Hybrid models were used to better model the nonlinearity exposed in the early stages, resulting in excellent prediction accuracy.

### 2.1 Research methodology

This study utilized novel hybrid models approach based on ARIMA, ANN, SVM and ARNN to predict five year ahead unemployment rate for developing nations of Asia.

**2.1.1 Autoregressive Integrated Moving Average (ARIMA) model.** ARIMA is a linear time series model utilised for following linear propensity findings in stationary time series. ARIMA is a representation of the ARIMA model (p, d, q). The AR model's strictures are p and q, whereas the MA model's differentiating level is d. We can mathematically express ARIMA

Table 1. Description of Asian developing countries unemployment data sets.

|                        | Pakistan | China | Bangladash | India | Indonesia | Sirlanka | Iran  |
|------------------------|----------|-------|------------|-------|-----------|----------|-------|
| Observations           | 370      | 552   | 470        | 375   | 370       | 370      | 375   |
| Training data set obs. | 295      | 450   | 380        | 280   | 275       | 280      | 285   |
| Testing data set obs.  | 75       | 105   | 90         | 95    | 95        | 90       | 95    |
| Max. Value             | 9.78     | 5.1   | 11.2       | 23.75 | 11.5      | 11.72    | 10.56 |
| Min. Value             | 0.97     | 2.3   | 6.8        | 9.18  | 6.5       | 8.83     | 7.2   |

<https://doi.org/10.1371/journal.pone.0275422.t001>

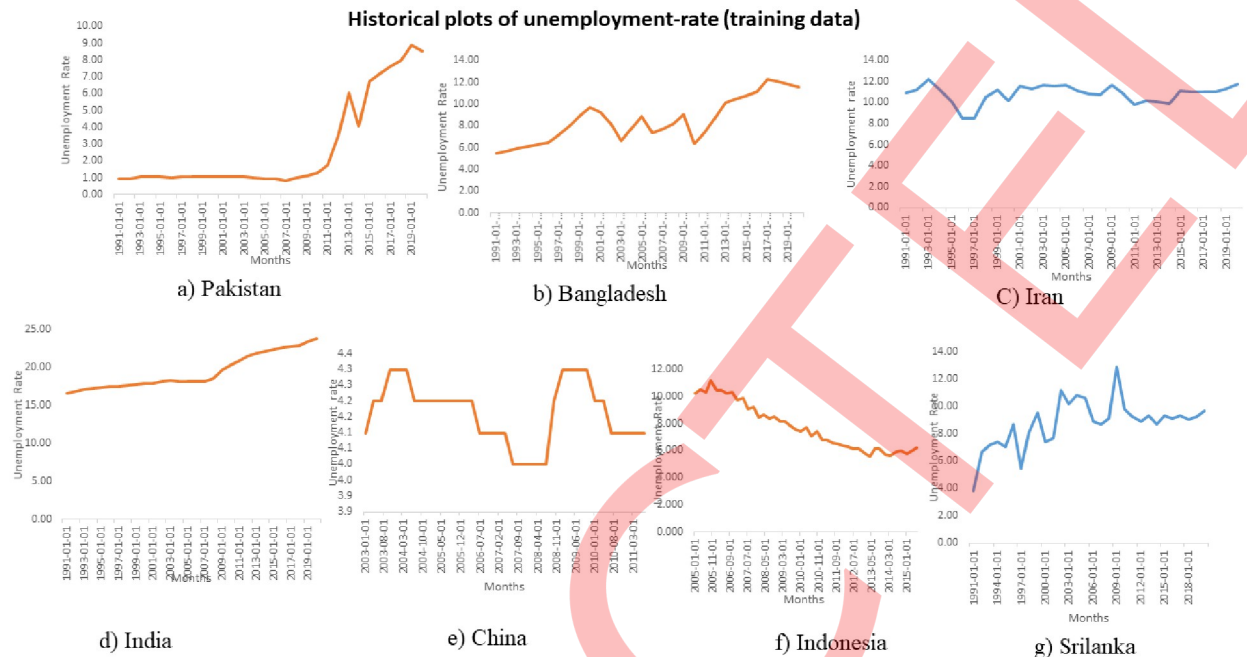

**Fig 1.** a-g. The real unemployment rate in selected Asian countries is graphically demonstrated.

<https://doi.org/10.1371/journal.pone.0275422.g001>

model as seen follows

$$y_t = \alpha_0 + \sum_{i=1}^p \phi_i x_{t-i} + \varepsilon_t + \sum_{j=1}^q \alpha_j \varepsilon_{t-j}, \quad (1)$$

Whereas,  $y_t$  proves the actual valuation of the inconstant possible at fact  $t$ ,  $\varepsilon_t$  is random error at time  $t$ ,  $\phi_i$  and  $\alpha_j$  are the coefficients of the model. The ARIMA model builds a random temporal structure knowledge set in the following phases: Auto-correlation Function (ACF) plots determined the lag order of the underline model [36, 48–51].

**2.1.2. ARNN model.** An ANN each of the three layers (info, hidden, and output) represents a different neural network design. From one layer to another, data is sent using a risk-reduction "learning calculation." A predetermined number of veiled neurons are used in the construction of the ARNN model for time-arrangement knowledge collection [35]. The model now includes previously rejected temporal arrangement computations. It has one concealed layer  $p$  and  $k$  hidden units in the hidden layer. BIC is also used to analyse ARNN ( $p$ ,  $k$ ) models. At this time  $\hat{z}_t$  is calculated with preferred precedent inspections  $z_{t-j_1}, \dots, z_{t-j_p}$ . Like the contributions. From one camouflaged sheet, the ARNN model will become clear.

$$\hat{z}_t = \phi_0 \left\{ w_{c_0} + \sum_k w_{k_0} \phi_k (w_{c_k} + \sum_i w_{i_k} \hat{y}_{t-j_i}) \right\}, \quad (2)$$

where  $\{w_{c_k}\}$  indicates the concerning weights and  $\phi_i$  is the creation task. Weights of the ARNN model are taught by means of a incline fall reverse broadcast algorithm [35]. The ARNN ( $p$ ,  $k$ ) model utilizes  $p$  as the figure of lags for an AR( $p$ ) model, and  $k$  is frequently set to  $k = \left\lceil \frac{(p+2)}{2} \right\rceil$  for non-cyclic time series data [36].

**2.1.3. SVM-model.** As per Vapnik [52] (SVMs). Consistent with SRM, SVMs aim to reduce the scope of hypothetical blunder in exchange for more grounded blunder. Moreover,



the SVM models provide the retreat utility by increasing the computation direct capacity over time. The SVM has the following relapse capacity:

$$z = w\phi(x) + b, \quad (3)$$

Such as  $\phi(x)$  is distinguished the trademark, which is non-direct arranged from the investment hole  $x$ . The coefficients  $w$  and  $b$  are unsurprising by lessening

$$R(C) = C \frac{1}{N} \sum_{i=1}^N L_{\varepsilon}(d_i, z_i) + \frac{1}{2} \|w\|^2, \quad (4)$$

$$L_{\varepsilon}(d, z) = \begin{cases} |d - z| - \varepsilon & |d - z| \geq \varepsilon, \\ 0 & \text{others,} \end{cases} \quad (5)$$

where both  $C$  and  $\varepsilon$  are prescribed parameters. The first term  $L_{\varepsilon}(d, z)$  is called the  $\varepsilon$ -intensive loss function. The  $d_i$  is the actual stock price in the  $i^{\text{th}}$  period. This function indicates that errors below  $\varepsilon$  are not penalized. The term  $C \frac{1}{N} \sum_{i=1}^N L_{\varepsilon}(d_i, z_i)$  is the empirical error. In the second term,  $\frac{1}{2} \|w\|^2$ , measures the evenness of the capacity.  $C$  evaluates the compromise between the observational danger and the levelness of the model. Presenting the positive leeway factors  $\gamma$  and  $\gamma^*$ , which represent the distance from the actual values to the corresponding boundary values of  $\varepsilon$ -tube. Eq 3 is transformed into the following constrained formation:

**Minimize**

$$R(w, \gamma, \gamma^*) = \frac{1}{2} ww^T + C^* \left( \sum_{i=1}^N (\gamma_i + \gamma_i^*) \right) \quad (6)$$

**Subjected to**

$$w\phi(z_i) + a_i - d_i \leq \varepsilon + \gamma_i^*, \quad (7)$$

$$\begin{aligned} d_i - w\phi(z_i) - a_i &\leq \varepsilon + \gamma_i \\ \gamma_i, \gamma_i^* &\geq 0, \quad i = 1, 2, \dots, N \end{aligned} \quad (8)$$

At long last, presenting Lagrangian multipliers and expanding the double capacity of Eq 5 changes Eq 6 to the accompanying structure:

$$R(\beta_i - \beta_i^*) = \sum_{i=1}^N d_i(\beta_i - \beta_i^*) - \varepsilon \sum_{i=1}^N \beta_i - \beta_i^* - \frac{1}{2} \sum_{i=1}^N \sum_{j=1}^N (\beta_i - \beta_i^*) \times (\beta_j - \beta_j^*) K(x_i, x_j) \quad (9)$$

with the constraints

$$\sum_{i=1}^N (\beta_i - \beta_i^*) = 0 \quad (10)$$

$$0 \leq \beta_i \leq C, \quad (11)$$

$$0 \leq \beta_i^* \leq C. \quad (12)$$

In Eq 9,  $\beta_i$  and  $\beta_i^*$  are called Lagrangian multipliers. They satisfy the equalities

$$\beta_i * \beta_i^* = 0$$

$$f(y, \beta_i, \beta_i^*) = \sum_{i=1}^l (\beta_i - \beta_i^*) K(x, x_i) + b. \quad (13)$$

Here,  $K(y, y_i)$  is called the kernel function. The value of the kernel is equal to the inner product of two vectors  $x_i$  and  $x_j$  in the feature space  $\phi(x_i)$  and  $\phi(x_j)$ , such that  $K(y, y) = \phi(y_i) * \phi(y_j)$ . Any function that satisfying Mercer's condition [49, 52, 53] can be used as the Kernel function. The Gaussian kernel function

$$K(x, x_i) = \exp(-||x_i - x_j||^2 / (2\sigma^2))$$

is determined in this study. SVMs were used to examine the anticipated informational index's non-direct behaviour since Gaussian pieces perform well under broad perfection suspicions.

**2.1.4. ANN-model.** ANNs are adaptable procedures for modeling non-linear pattern. ANN models have the advantage over other non-direct models of being uniform approximations dictated by several limitations. Their strength comes from the repetition of the same information. They may eliminate any prior model suspicions during model development. The information characteristics can also affect the organisation model. The most often used model for predicting and forecasting chronological data is artificial neural networks [54]. The model is composed of three layers of basic to-give units linked by a repeating connection. The interaction among the produce ( $z_t$ ) and the inputs ( $z_{t-1}, z_{t-2}, \dots, z_{t-p}$ ) has the following mathematical illustrations:

$$z = \alpha_0 + \sum_{j=1}^q \alpha_j g \left( \beta_{0j} + \sum_{i=1}^p \beta_{ij} y_{t-i} \right) + \varepsilon_t, \quad (14)$$

where  $j = 0, 1, 2, \dots, q$  and  $\beta_{ij} (i = 0, 1, 2, \dots, p; j = 0, 1, 2, \dots, q)$ , here  $p$  is the number of information hubs and  $q$  the number of hidden hubs. In other words, the strategic capability is often used as a covert layer manoeuvre.

$$g(y) = \frac{1}{1 + \exp(-y)}. \quad (15)$$

Hence, the ANN model of Eq 13 in fact, performs a non-linear functional mapping from the past observations ( $z_{t-1}, z_{t-2}, \dots, z_{t-p}$ ) to the future value  $z_t$ , i.e.,

$$z_t = g(z_{t-1}, z_{t-2}, \dots, z_{t-p}, w) + \varepsilon_t, \quad (16)$$

A vector containing all parameters, and a function of the network design and connection weights. So a non-linear autoregressive model is a network. For one-step-ahead estimate, Eq 13 means one output node.

### 3. Hybrid modeling approach

Hybrid demonstrating is used in two phases to handle nonstationary time series. Initially, the immediate component of the time series was shown using the ARIMA(p,d,q) model, and then the non-linear component was modelled using advanced approaches ANN, SVM, and ARNN models. Two findings are combined to get a point estimate. The hybrid modelling approach uses machine learning models to assess patterns. An analysis of unemployment rates in developing nations of Asia using hybrid ARIMA-ANN, ARNN, and SVM models.

### 3.1 Hybrid ARIMA-ARNN model

We utilised a two-stage ARIMA-ARNN model. Initially, an ARIMA model is employed to forecast the linear component of the data. In addition, the ARNN technique was used to model nonlinear part of the data. The preparation of the planned hybrid ARIMA-ARNN model ( $M_t$ ) can be expressed as:

$$M_t = Y_t + Z_t, \quad (17)$$

where  $Y_t$  is the linear fraction, and  $Z_t$  is the non-linear element of the combination model. We can estimate  $Y_t$  and  $Z_t$  together from the training data set. Let,  $\hat{Y}_t$  be the anticipate cost of the ARIMA model at time  $t$  plus  $a_t$  stands for the error outstandings at point  $t$ , found from the ARIMA model. We can after that mark

$$a_t = M_t - \hat{Y}_t. \quad (18)$$

The ARNN model represented the remaining section as follows:

$$a_t = g(\varepsilon_{t-1}, \varepsilon_{t-2}, \dots, \varepsilon_{t-n}) + \gamma_t,$$

for an observation of size  $n$ ,

Where,  $h$  is a non-linear ARNN model function and  $\gamma_t$  is the random errors. So we can write the mutual estimation as:

$$\hat{Q}_t = \hat{X}_t + \hat{M}_t, \quad (19)$$

Where ARNN model  $\hat{M}_t$  is standard. ARNN models the missing auto-relationships in ARIMA. The direct ARIMA model's ability to generate repeated measure is limited by model disregard measures and unemployment rate time series. If the mixture series is recreated, the unpredictable indicators' efficiency can be slightly increased. The same two-phase method is used for ARIMA-ANN and ARIMA-SVM. The algorithmic presentation of mixing expectation is as follows:

**Algorithm of Hybrid modeling approach for unemployment rate prediction**

Step-1 Initiate:

Divide the data into two groups: {Training} + {Testing}

Step-2 Accomplished: Implement and select best ARIMA ( $p$ ,  $d$ ,  $q$ ) model by means of training data

- Parameters of ARIMA model ( $p$ ,  $d$  and  $q$ ) were selected by ways information criteria (BIC, AIC etc.)
- Acquired prediction of ARIMA model using training observation.
- Using ARIMA prediction achieve random error ( $\hat{a}_t$ )

Step-3 Accomplished: Acquire best ANN model from training observation residuals

- Accomplished lag selection on training data set residuals and then apply ANN model with  $p$  selected lagged input from residuals and  $k$  hidden units.
- Acquire prediction of residuals using ANN model

Step-4 Estimation of unemployment rate ( $\hat{Q}_t$ ): Combine both the predictions (ARIMA and ANN models) to obtain final prediction.

Step-5 Repeat: Step 3-4 by initiating SVM and ARNN.

### 3.2 Data and computational environment

The data utilised in this study came from the FRED Financial Informational Indexes database, accessible at <https://fred.stlouisfed.org>. The work shown here was done in R-studio, a free



online statistical programming tool. The "forecast" programme calculated a traditional ARIMA (p, d, q). It uses the "e1071" package for SVM and the "nnetar" function for ARNN. The "mlp" function calculated the ANN model. In artificial neural networks, we assume one hidden layer.

### 3.3 Performance evaluation metrics of hybrid-models

The mean-absolute error (MAE), mean-absolute percent error (MAPE), and root-mean square error (RMSE) of [41] are used to assess the unemployment rate predictions models. These measurements are expressed quantitatively as;

$$MAE = \frac{1}{n} \sum_{i=1}^n |B_i - \hat{B}_i|, \quad (20)$$

$$MAPE = \frac{1}{n} \sum_{i=1}^n \left| \frac{B_i - \hat{B}_i}{B_i} \right|, \quad (21)$$

$$RMSE = \sqrt{\frac{1}{n} \sum_{i=1}^n (B_i - \hat{B}_i)^2} \quad (22)$$

where  $B_i$  is the actual output,  $\hat{B}_i$  is the observed output, and "n" is the number of time varying observations.

## 4. Results and discussion

Table 1 shows two groupings of observations for the unemployment rate in seven Asian nations. The underlined time series are non-stationary and non-linear, as measured (see segment. 2.1). Fig 1 shows the nonlinearity of these datasets for developing Asian nations. To compare the models, we used the ARIMA-ARNN model from [55], the ARIMA-ANN model from [36], and the hybrid ARIMA-SVM model from [42].

We employed the "predict" package to best fit the ARIMA model in the R-studio computational environment. For this reason, we must first define p, d, and q (the model). Fig 2 shows the graph of the order selection of ARIMA for each time series using ACF and PACF to better fit the data. In the ARIMA model, d was the lag at which the data became stationary. The best ARIMA model for each developing country is chosen using AIC and log-likelihood (Table 2).

The best ARIMA model was then used for one and five year ahead forecast. We also obtained random errors from projected training outcomes. In the next stage, we modelled ARIMA residuals with ARNN (p, k) model. To make the estimates positive, we set the Case Cox modification to 0 earlier. The assessment of p and k is characterised by following the suggestion of [36, 56–58]. To achieve the final findings, we merged the direct ARIMA model with non-linear ARNN output. Also, in this research, Support Vector Machines (SVM) and their Artificial Neural Network (ANN) combination were provided. We used one hidden layer for the ANN model's to make the calculation simple of 'kn' neurons, where "n" is the sample size of training data set. The ARIMA (1,1,2) model has the greatest AIC and log-likelihood values of -155.28 and 85.67. The ARNN (3,2) model was then calibrated to ARIMA residuals, with an average of 16 networks (1,1,2). Using the testing observations, we created a hybrid ARIMA-ARNN, ARIMA-ANN, and ARIMA-SVM model to predict the future. Table 3 shows the performance metrics for one and five years ahead for hybrid vehicles in China. Similarly, the ARIMA (2,1) model fits the Pakistani training data set better, with AIC = -464.05 and L = 333.03. An ARNN (3,1) model was tuned to ARIMA results using a typical 16 network

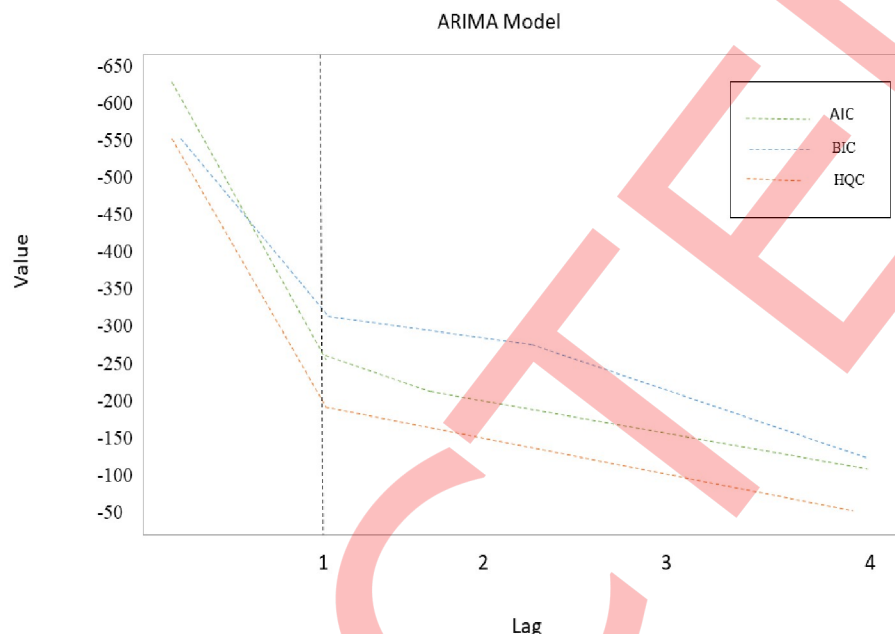

**Fig 2. Order(d) selection of ARIMA model for unemployment data set.**

<https://doi.org/10.1371/journal.pone.0275422.g002>

with two weights each (2,1,1). The final prediction uses the ARIMA and ARNN anticipated effects to estimate the MAE, MAPE, and RMSE. Table 3 shows Pakistan's performance matrices. Sri Lanka's ARIMA (2,1,2) model has an AIC of -688.11 and a log probability (L) of 551. It was also fitted to the ARIMA residuals in stage one, which is a 19-9-1 network by 150 weights, using an average of 16 networks. Finally, the final prediction combines the ARIMA and ARNN projections. Table 3 presents RMSE, MAE, and MAPE as a function of final anticipated value. Table 3 shows the results of applying all forecasting models to the India and Bangladesh data sets. We simulate the ARIMA residuals with an ARNN (16,4) model with a 16-network intermediate. We used ARIMA (1,1,1) residuals to fit an ARNN (12,5) model on Indonesian monthly data (1,1,1). Table 3 shows relevant results. ARIMA(1,1,2) also fit Iran. The ANN model was used to adjust the residuals from each ARIMA model. The final forecast is made by combining the findings from each instance using the ARIMA model. The model's performance is evaluated using MAE, RMSE, and MAPE values, as shown in Table 3.

In Table 3, relevant modelling methods including ARIMA, ANN, ARNN, and SVM were used on unemployment data sets from Asia's developing nations. Fig 3a–3g attract and provide forecasts for the testing observation of the best appropriate hybrid model for chosen nations data.

Its figure, precision is higher than any remaining people and hybrid models for all developing countries in Asia. For most countries, hybrid ARIMA-SVM and hybrid ARIMA-ANN perform comparatively, though ARIMA-ANN outperforms among all models utilized for Asian developing countries. The exposure in China's unemployment rate is somewhat low contrasting with other Asian countries since China's unemployment rate time series is mostly utilizing hybrid ARIMA-ANN model. The most dire outcome imaginable is India, where the Covid produces gigantic joblessness and has expanded the current jobless rate. The best fitting models were utilized to produce one-year and five-year projections for every selected seven countries, as displayed in Table 4. The point forecast shows that the unemployment rate in chosen Asian countries would remain high for the following three years, prior to declining and balancing out following five years.

Table 2. Best model selection through information criteria (AIC and log-likelihood).

| Countries  | ARIMA-Models        | Statistical Decion Creteria |                |
|------------|---------------------|-----------------------------|----------------|
|            |                     | AIC                         | log-likelihood |
| Pakistan   | ARIMA(1,0,1)        | -557.01                     | 357.10         |
|            | ARIMA(1,0,2)        | -478.07                     | 401.01         |
|            | ARIMA(1,1,2)        | -497.05                     | 374.04         |
|            | ARIMA(2,0,1)        | -505.03                     | 415.02         |
|            | <b>ARIMA(2,1,1)</b> | <b>-465.05</b>              | <b>333.03</b>  |
| China      | ARIMA(1,0,1)        | -167.13                     | 101.01         |
|            | ARIMA(1,0,2)        | -171.11                     | 97.05          |
|            | <b>ARIMA(1,1,2)</b> | <b>-157.28</b>              | <b>86.67</b>   |
|            | ARIMA(2,0,1)        | -161.21                     | 93.07          |
|            | ARIMA(1,0,2)        | -177.15                     | 89.15          |
| Bangladash | ARIMA(1,0,1)        | -734.51                     | 814.36         |
|            | ARIMA(1,0,2)        | -698.56                     | 789.51         |
|            | ARIMA(1,1,2)        | -714.15                     | 756.31         |
|            | ARIMA(2,0,1)        | -711.63                     | 786.19         |
|            | <b>ARIMA(2,1,2)</b> | <b>-683.71</b>              | <b>745.54</b>  |
| India      | ARIMA(1,0,1)        | -745.10                     | 811.03         |
|            | ARIMA(1,0,2)        | -780.67                     | 796.45         |
|            | ARIMA(1,1,2)        | -810.11                     | 860.01         |
|            | ARIMA(2,0,1)        | -847.21                     | 768.15         |
|            | <b>ARIMA(3,1,1)</b> | <b>-681.71</b>              | <b>741.54</b>  |
| Indonesia  | ARIMA(1,0,1)        | -415.10                     | 377.07         |
|            | ARIMA(1,0,2)        | -367.56                     | 451.15         |
|            | <b>ARIMA(1,1,1)</b> | <b>-345.10</b>              | <b>297.89</b>  |
|            | ARIMA(2,0,1)        | -446.06                     | 343.61         |
|            | ARIMA(1,0,2)        | -497.01                     | 305.11         |
| Sirlanka   | ARIMA(1,0,1)        | -741.10                     | 611.10         |
|            | ARIMA(1,0,2)        | -711.01                     | 567.71         |
|            | <b>ARIMA(2,1,2)</b> | <b>-688.11</b>              | <b>551.05</b>  |
|            | ARIMA(2,0,1)        | -698.41                     | 600.01         |
|            | ARIMA(1,0,2)        | -748.51                     | 611.13         |
| Iran       | <b>ARIMA(1,1,2)</b> | <b>-345.46</b>              | <b>277.70</b>  |
|            | ARIMA(1,0,2)        | -401.45                     | 317.20         |
|            | ARIMA(2,1,2)        | -365.01                     | 284.50         |
|            | ARIMA(3,1,1)        | -397.39                     | 345.17         |
|            | ARIMA(2,1,1)        | -461.11                     | 361.10         |

<https://doi.org/10.1371/journal.pone.0275422.t002>

## 5 Conclusion and implementations

The unemployment rate is a reliable indicator of the job market environment. The monthly unemployment rate of a region is one of the most important financial events for investors. The influence of the unemployment rate on stock returns varies depending on the country's economy. Concluding the unemployment rate accurately helps consumers avoid market risk from surprising changes in project conditions and economic care. This study builds on our prior research on the effects of corona virus on global unemployment [46, 49, 50, 59–61]. In this study, we used ARIMA, ANN, SVM, and ARNN hybrid models to predict feasible unemployment. With the hybrid modeling approach, the systematic and non-systematic parts of the

Table 3. Performance evaluation metrics for hybrid prediction models for developing countries of Asia.

| Countries  | Model                    | 1-Years ahead forecast |              |              | 5-Year ahead forecast |              |              |
|------------|--------------------------|------------------------|--------------|--------------|-----------------------|--------------|--------------|
|            |                          | MAE                    | MAPE         | RMSE         | MAE                   | MAPE         | RMSE         |
| Sri Lanka  | ARIMA                    | 0.257                  | 3.328        | 0.249        | 1.279                 | 1.285        | 4.673        |
|            | ARNN                     | 0.482                  | 3.895        | 0.357        | 1.214                 | 1.847        | 12.735       |
|            | ANN                      | 0.378                  | 4.575        | 0.353        | 1.731                 | 1.584        | 11.518       |
|            | SVM                      | 0.438                  | 5.753        | 0.496        | 1.234                 | 1.978        | 15.935       |
|            | <b>Hybrid ARIMA-ARNN</b> | <b>0.257</b>           | <b>3.251</b> | <b>0.298</b> | <b>1.197</b>          | <b>1.234</b> | <b>4.529</b> |
|            | Hybrid ARIMA-ANN         | 0.357                  | 3.344        | 0.319        | 1.206                 | 1.255        | 4.668        |
|            | Hybrid ARIMA-SVM         | 0.351                  | 3.624        | 0.381        | 1.208                 | 1.262        | 4.706        |
| Iran       | ARIMA                    | 1.219                  | 4.003        | 1.244        | 1.685                 | 8.708        | 1.647        |
|            | ARNN                     | 1.274                  | 4.906        | 1.328        | 1.614                 | 8.365        | 1.637        |
|            | ANN                      | 1.292                  | 5.177        | 1.349        | 1.613                 | 8.247        | 1.651        |
|            | SVM                      | 1.274                  | 4.906        | 1.328        | 1.740                 | 8.921        | 1.798        |
|            | <b>Hybrid ARIMA-ARNN</b> | <b>0.215</b>           | <b>2.193</b> | <b>0.234</b> | <b>1.601</b>          | <b>8.017</b> | <b>1.727</b> |
|            | Hybrid ARIMA-ANN         | 0.218                  | 3.002        | 0.253        | 1.618                 | 8.387        | 1.739        |
|            | Hybrid ARIMA-SVM         | 0.220                  | 3.023        | 0.275        | 1.621                 | 8.017        | 1.746        |
| Pakistan   | ARIMA                    | 0.193                  | 2.495        | 0.199        | 0.353                 | 5.977        | 1.391        |
|            | ARNN                     | 0.202                  | 8.789        | 0.209        | 0.533                 | 6.365        | 1.669        |
|            | ANN                      | 0.223                  | 6.395        | 0.237        | 0.505                 | 7.394        | 1.764        |
|            | SVM                      | 0.199                  | 3.594        | 0.301        | 1.291                 | 4.156        | 1.800        |
|            | Hybrid ARIMA-ANN         | 0.271                  | 3.068        | 3.077        | 1.509                 | 7.272        | 3.566        |
|            | <b>Hybrid ARIMA-ARNN</b> | <b>0.197</b>           | <b>2.568</b> | <b>2.182</b> | <b>1.297</b>          | <b>5.243</b> | <b>2.306</b> |
|            | Hybrid ARIMA-SVM         | 0.329                  | 2.837        | 2.590        | 1.305                 | 6.120        | 3.160        |
| China      | ARIMA                    | 0.419                  | 4.003        | 1.244        | 0.305                 | 3.658        | 1.284        |
|            | ARNN                     | 0.674                  | 5.906        | 3.328        | 0.412                 | 3.797        | 1.224        |
|            | ANN                      | 0.392                  | 6.177        | 2.349        | 0.338                 | 3.336        | 1.224        |
|            | SVM                      | 0.774                  | 5.906        | 2.328        | 0.410                 | 4.525        | 1.389        |
|            | Hybrid ARIMA-ARNN        | 1.324                  | 3.197        | 1.335        | 0.321                 | 3.544        | 1.291        |
|            | Hybrid ARIMA-SVM         | 1.318                  | 3.132        | 1.273        | 0.369                 | 3.502        | 1.287        |
|            | <b>Hybrid ARIMA-ANN</b>  | <b>1.221</b>           | <b>3.021</b> | <b>1.245</b> | <b>0.318</b>          | <b>3.321</b> | <b>1.263</b> |
| Bangladesh | ARIMA                    | 3.175                  | 3.623        | 1.183        | 2.206                 | 2.230        | 6.671        |
|            | ARNN                     | 3.167                  | 3.095        | 1.189        | 3.204                 | 2.848        | 12.935       |
|            | ANN                      | 3.173                  | 3.084        | 1.191        | 2.738                 | 2.584        | 11.518       |
|            | SVM                      | 3.268                  | 3.915        | 1.373        | 3.204                 | 2.978        | 15.935       |
|            | <b>Hybrid ARIMA-ANN</b>  | <b>2.198</b>           | <b>3.183</b> | <b>1.255</b> | <b>2.197</b>          | <b>2.234</b> | <b>4.829</b> |
|            | <b>Hybrid ARIMA-ARNN</b> | <b>2.167</b>           | <b>3.017</b> | <b>1.218</b> | <b>1.206</b>          | <b>1.255</b> | <b>4.668</b> |
|            | Hybrid ARIMA-SVM         | 0.185                  | 2.135        | 0.165        | 1.228                 | 1.272        | 4.726        |
| India      | ARIMA                    | 3.093                  | 3.495        | 1.099        | 1.685                 | 8.708        | 1.647        |
|            | ARNN                     | 3.102                  | 8.789        | 1.109        | 1.614                 | 8.365        | 1.637        |
|            | ANN                      | 3.123                  | 6.395        | 1.137        | 1.613                 | 8.247        | 1.651        |
|            | SVM                      | 3.099                  | 3.594        | 1.101        | 1.740                 | 9.92         | 1.798        |
|            | Hybrid ARIMA-ANN         | 2.371                  | 3.868        | 1.077        | 1.631                 | 8.537        | 1.727        |
|            | <b>Hybrid ARIMA-ARNN</b> | <b>2.086</b>           | <b>3.551</b> | <b>1.022</b> | <b>1.615</b>          | <b>8.387</b> | <b>1.718</b> |
|            | Hybrid ARIMA-SVM         | 2.189                  | 3.837        | 1.190        | 1.761                 | 8.417        | 1.835        |

(Continued)

Table 3. (Continued)

| Countries | Model             | I-Years ahead forecast |       |       | 5-Year ahead forecast |       |       |
|-----------|-------------------|------------------------|-------|-------|-----------------------|-------|-------|
|           |                   | MAE                    | MAPE  | RMSE  | MAE                   | MAPE  | RMSE  |
| Indonesia | ARIMA             | 1.219                  | 4.003 | 1.244 | 1.297                 | 5.177 | 1.221 |
|           | ARNN              | 1.274                  | 4.906 | 1.388 | 1.405                 | 6.394 | 1.464 |
|           | ANN               | 1.292                  | 5.177 | 1.379 | 1.433                 | 6.365 | 1.469 |
|           | SVM               | 1.274                  | 5.906 | 1.358 | 1.409                 | 6.272 | 1.466 |
|           | Hybrid ARIMA-SVM  | 1.214                  | 3.192 | 1.275 | 1.255                 | 5.120 | 1.390 |
|           | Hybrid ARIMA-ANN  | 1.218                  | 4.002 | 1.283 | 1.305                 | 5.120 | 1.335 |
|           | Hybrid ARIMA-ARNN | 1.221                  | 3.013 | 1.245 | 1.287                 | 4.154 | 1.331 |

<https://doi.org/10.1371/journal.pone.0275422.t003>

unemployment rate were successfully demonstrated. Because the unemployment rate is constant in some countries, ARNN adjusts the residuals from the fitted ARIMA model. Because of the technique's limited disclosures, these iterative methods provide extremely dependable and precise results which is in line with the findings of Castillo [33, 58]. A closer look at the data reveals several interesting findings: first, almost all of the countries included in this study have had no consistent pattern of unemployment over the years; second, the hybrid-based modeling approach improved both long-term and short-term objectives, and improved individual univariate forecasting.

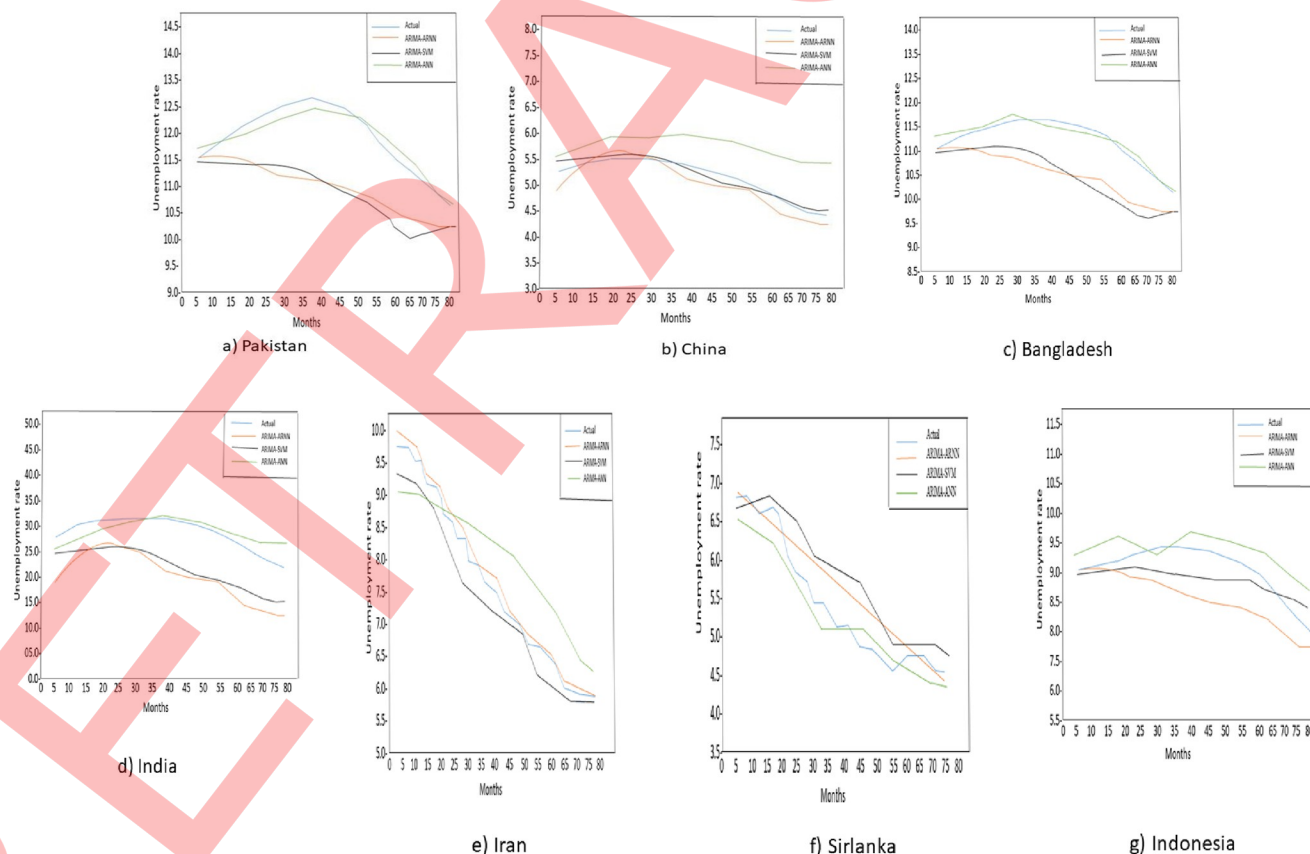

**Fig 3. a-g.** Prediction of unemployment rate in Asia using selected hybrid model.

<https://doi.org/10.1371/journal.pone.0275422.g003>



Table 4. One and five-years ahead point projection based on the best hybrid model for developing countries of Asia.

| Country    | Method            | 1-Year ahead forecast | 5-Years ahead forecast |
|------------|-------------------|-----------------------|------------------------|
| Sri Lanka  | Hybrid ARIMA-ARNN | 8.1                   | 5.7                    |
| Iran       | Hybrid ARIMA-ARNN | 6.5                   | 5.7                    |
| Pakistan   | Hybrid ARIMA-ARNN | 12.9                  | 7.4                    |
| China      | Hybrid ARIMA-ARNN | 5.2                   | 3.3                    |
| Bangladesh | Hybrid ARIMA-ARNN | 12.8                  | 9.7                    |
| India      | Hybrid ARIMA-ARNN | 23.5                  | 19.2                   |
| Indonesia  | Hybrid ARIMA-ARNN | 8.9                   | 6.5                    |

<https://doi.org/10.1371/journal.pone.0275422.t004>

### 5.1. Future research work

The scientific community must immediately collaborate to develop new and improved methodologies, tactics, forecasting tools, and models to better understand and control pandemic consequences. Based on the findings of this study, the responsible authority should adopt particular policies, especially in developing countries, to address the problem of corona virus unemployment. Concrete strategies are necessary for commercial and economic survival following the Corona virus in both developed and developing nations.

### Author Contributions

**Conceptualization:** Yousaf Ali Khan.

**Data curation:** Yousaf Ali Khan, Man-Wen Tian.

**Formal analysis:** Yousaf Ali Khan.

**Funding acquisition:** Lumin Shi, Yousaf Ali Khan.

**Investigation:** Yousaf Ali Khan, Man-Wen Tian.

**Methodology:** Yousaf Ali Khan.

**Resources:** Man-Wen Tian.

**Software:** Yousaf Ali Khan.

**Supervision:** Lumin Shi.

**Visualization:** Yousaf Ali Khan.

**Writing – review & editing:** Lumin Shi, Yousaf Ali Khan, Man-Wen Tian.

### References

1. Blanchard O. J., & Leigh D. (2013). Growth forecast errors and fiscal multipliers. *American Economic Review*, 103(3), 117–20.
2. Milas C., & Rothman P. (2008). Out-of-sample forecasting of unemployment rates with pooled stvecm forecasts. *International Journal of Forecasting*, 24(1), 101–121.
3. Funke M. (1992). Time-series forecasting of the German unemployment rate. *Journal of Forecasting*, 11(2), 111–125.
4. Anton Pak, O. A. (2020). Economic Consequences of the COVID-19 Outbreak: The Need for Epidemic Preparedness. *Frontiers in Public Health* @ [www.frontiersin.org](http://www.frontiersin.org), (04) 01–04.
5. Ay şegül, Ş. M. (2020). The Unemployment Cost of COVID-19: How High and How Long? *Economic Commentary* @ *Federal Reserve Bank of Cleveland*, (06) 01–07.
6. OECD. (2020). COVID-19-19 crisis response in Central Asia. COVID-19-19 Crisis Response in Central Asia © *OECD 2020*, (02) 01–47. <https://www.oecd.org/employment/emp/42546043.pdf>

7. Quiggin, D. (2020, 06 23). Green Industries Can Accelerate a True Jobs-Focused Recovery. Retrieved 09 26, 2020, from Chatham House: <https://www.chathamhouse.org/>
8. Castillo O., & Melin P. (2020). Forecasting of COVID-19 time series for countries in the world based on a hybrid approach combining the fractal dimension and fuzzy logic. *Chaos, Solitons & Fractals*, 140, 110242. <https://doi.org/10.1016/j.chaos.2020.110242> PMID: 32863616
9. Economica, A. (2020, 07 05). The somber impact of COVID-19-19 in European labor markets. Retrieved 09 25, 2020, from Public Agenda: [www.http://agendapublica.elpais.com/](http://agendapublica.elpais.com/)
10. Jha S., Goyal M. K., Gupta B., & Gupta A. K. (2021). A novel analysis of COVID 19 risk in India incorporating climatic and socioeconomic Factors. *Technological forecasting and social change*, 167, 120679. <https://doi.org/10.1016/j.techfore.2021.120679> PMID: 33642623
11. Shafi M., Liu J., and Ren W., (2020). Impact of COVID-19 pandemic on micro, small, and medium-sized Enterprises operating in Pakistan. *Research in Globalization*. <https://doi.org/10.1016/j.resglo.2020.100018>
12. Clark, D. (2020, 05 29). Unemployment rate forecasts in selected European countries from 2020 to 2021 Retrieved 09 27, 2020, from Society Economy: <https://www.statista.com/>
13. Akter S. (2020). Covid-19 and Bangladesh: Threat of unemployment in the economy. *North American Academic Research*, 3(8) 79–104, 2020, <https://doi.org/10.5281/zenodo.3986907>
14. Data, E. (2020, 06 11). Changes in the labour market. Retrieved 09 27, 2020, from European Data Portal: <https://www.europeandataportal.eu/en>
15. Warwick M. R. (2020). The Global Macroeconomic Impacts of COVID-19-19: Seven Scenarios. *Centre of Excellence in Population Ageing*, ( 25) 1–43.
16. International Labor Organization (2020). Tackling the COVID-19 youth employment crisis in Asia and the Pacific. [https://www.ilo.org/wcmsp5/groups/public/-asia/-ro-bangkok/documents/publication/wcms\\_753369.pdf](https://www.ilo.org/wcmsp5/groups/public/-asia/-ro-bangkok/documents/publication/wcms_753369.pdf)
17. Merkl C., and Weber E. 2020. "Safeguarding the Work Market in the midst of Coronavirus: Remember Fresh recruits." *VoxEU.org*, 7 April.
18. Vicente M. R., López-Menéndez A. J., & Pérez R. (2015). Forecasting unemployment with internet \search data: Does it help to improve predictions when job destruction is skyrocketing? *Technological Forecasting and Social Change*, 92, 132–139.
19. Walter D. (2020). Implications of Covid-19 for Labour and Employment in India. *The Indian Journal of Labour Economic Volume* 63, pages 47–51.
20. Edlund P. O., & Karlsson S. (1993). Forecasting the Swedish unemployment rate var vs. Transfer function modelling. *International Journal of Forecasting*, 9(1), 61–76.
21. Dumičić K., Čeh Časni A., & Žmuk B. (2015). Forecasting unemployment rate in selected European countries using smoothing methods. *World Academy of Science, Engineering and Technology: International Journal of Social, Education, Economics and Management Engineering*, 9(4), 867–872.
22. Khan Jaffur Z. R., Sookia N. U. H., Nunkoo Gonpot P., & Seetanah B. (2017). Out-of-sample forecasting of the Canadian unemployment rates using univariate models. *Applied Economics Letters*, 24(15), 1097–1101.
23. Montgomery A. L., Zarnowitz V., Tsay R. S., & Tiao G. C. (1998). Forecasting the us unemployment rate. *Journal of the American Statistical Association*, 93(442), 478–493.
24. Proietti T. (2003). Forecasting the us unemployment rate. *Computational Statistics and Data Analysis*, 42(3), 451–476.
25. Nagao S., Takeda F., & Tanaka R. (2019). Now casting of the us unemployment rate using google trends. *Finance Research Letters*, 30, 103–109.
26. Katris C. (2019). Prediction of unemployment rates with time series and machine learning techniques. *Computational Economics*, pp 1–34.
27. Atsalakis G., Ucenic C. I., Skiadas C., et al. (2007). Forecasting unemployment rate using a Neural network with fuzzy inference system. In: *ICAP*.
28. Moshiri S., & Brown L. (2004). Unemployment variation over the business cycles: A comparison of forecasting models. *Journal of Forecasting*, 23(7), 497–511.
29. Peláez R. F. (2006). Using neural nets to forecast the unemployment rate. *Business Economics*, 41 (1), 37–44.
30. Wang, G., & Zheng, X. (2009). The unemployment rate forecast model basing on bp neural network. In: 2009 International Conference on Electronic Computer Technology. IEEE, pp 475–478.
31. Feuerriegel S., & Gordon J. (2019). News-based forecasts of macroeconomic indicators: A Semantic path Model for interpretable predictions. *European Journal of Operational Research*, 272(1), 162–175.

32. Li D., Deng L., Gupta B. B., Wang H., & Choi C. (2019). A novel CNN based security guaranteed image watermarking generation scenario for smart city applications. *Information Sciences*, 479, 432–447.
33. Castillo O., & Melin P. (2021, February). A novel method for a covid-19 classification of countries based on an intelligent fuzzy fractal approach. In *Healthcare* (Vol. 9, No. 2, p. 196). Multidisciplinary Digital Publishing Institute. <https://doi.org/10.3390/healthcare9020196> PMID: 33578902
34. Galbraith J. W., & van Norden S. (2019). Asymmetry in unemployment rate forecast errors. *International Journal of Forecasting*.
35. Faraway J., & Chatfield C. (1998). Time series forecasting with neural networks: A Comparative research Using the airline data. *Journal of the Royal Statistical Society. Series C (Applied Statistics)*, 47(2), 231–250.
36. Teräsvirta T., Van Dijk D., & Medeiros M. C. (2005). Linear models, smooth transition autoregressions, and neural networks for forecasting macroeconomic time series: A re-examination. *International Journal of Forecasting*, 21(4), 755–774.
37. Hyndman, R. J., & Athanasopoulos, G. (2018). *Forecasting: Principles and practice*. OTexts.
38. Oliveira M. R., & Torgo L. (2014). Ensembles for time series forecasting. *Journal of Machine Learning Research*, 39, 360–370.
39. Khashei M., & Bijari M. (2011). Which methodology is better for combining linear and non-linear models for time series forecasting? *Journal of Industrial and Systems Engineering*, 4(4), 265–285.
40. Firmino P. R. A., de Mattos Neto P. S., & Ferreira T. A. (2014). Correcting and combining time series forecasters. *Neural Networks*, 50, 1–11. <https://doi.org/10.1016/j.neunet.2013.10.008> PMID: 24239986
41. Zhang G. P. (2003). Time series forecasting using a hybrid arima and neural network model. *Neurocomputing*, 50, 159–175.
42. Pai P. F., & Lin C. S. (2005). A hybrid arima and support vector machines model in stock price forecasting. *Omega*, 33(6), 497–505.
43. Aladag C. H., Egrioglu E., & Kadilar C. (2009). Forecasting non-linear time series with a Hybrid methodology. *Applied Mathematics Letters*, 22(9), 1467–1470.
44. Chakraborty T., Chattopadhyay S., & Ghosh I. (2019). Forecasting dengue epidemics using a Hybrid methodology. *Physica A: Statistical Mechanics and its Applications*, 527(121), 266.
45. Chakraborty T., & Ghosh I. (2020). Real-time forecasts and risk assessment of novel Coronavirus (covid-19) cases: A data-driven analysis. *Chaos, Solitons and Fractals*, 135(109), 850.
46. Yan Shu-Rong, Fazilati Mohammad Ali, Boushehri Reza, Mehryaar Ehsan, Toghraie Davood, Nguyen Quyen, et al. Experimental analysis of a new generation of membrane liquid desiccant air-conditioning (LDAC) system with free convection of desiccant for energy economic management. *Journal of Energy Storage*, Volume 29, June 2020, 101448. <https://doi.org/10.1016/j.est.2020.101448>
47. Wang Hong, Liu De-Hua, Yu Li-li, Chen Guang-Ju, Yan Hong-Ping, Tian Man-Wen, et al, Analysis on the reading guidance to classics in the teaching of specialized courses in tourism undergraduate education in China, *International Journal of Electrical Engineering & Education*. JUN 2020. <https://doi.org/10.1177/0020720920931073>
48. Economic Research. (2020) FRED Economic Data. <https://fred.stlouisfed.org>.
49. Sedik A., Hammad M., Abd El-Samie F. E., Gupta B. B., & Abd El-Latif A. A. (2021). Efficient deep learning approach for augmented detection of Coronavirus disease. *Neural Computing and Applications*, 1–18. <https://doi.org/10.1007/s00521-020-05410-8> PMID: 33487885
50. Yan S. R., Fazilati M. A., Samani N., Ghasemi H. R., Toghraie D., Nguyen Q., et al. (2020). Energy efficiency optimization of the waste heat recovery system with embedded phase change materials in greenhouses: a thermo-economic-environmental study. *Journal of Energy Storage*, 30, 101445.
51. Tian Man-Wen, Wang Suling, Yan Shu-Rong. Damage Assessment of Marine Pollution Disasters to Biological Resources Based on Numerical Models. *Acta Microscopica*, Vol. 28, No.3, 2019, pp.490–497.
52. Vapnik V. (1995). *The nature of statistic learning theory*. New York: Springer.
53. Masud M., Gaba G. S., Alqahtani S., Muhammad G., Gupta B. B., Kumar P., et al. (2020). A Lightweight and Robust Secure Key Establishment Protocol for Internet of Medical Things in COVID-19 Patients Care. *IEEE Internet of Things Journal*. <https://doi.org/10.1109/JIOT.2020.3047662> PMID: 35782176
54. Zhang G., Patuwo E. B., & Hu M. Y. (1998). Forecasting with artificial neural networks: the state of the art. *Int. J. Forecasting* 14 (1998) 35–62.
55. Chakraborty T., Chakraborty A. K., Biswas M., Banerjee S., & Bhattacharya S. (2020). Unemployment Rate Forecasting: A Hybrid Approach. *Computational Economics* <https://doi.org/10.1007/s10614-020-10040-2>

56. Melin P., Monica J. C., Sanchez D., & Castillo O. (2020, June). Multiple ensemble neural network models with fuzzy response aggregation for predicting COVID-19 time series: the case of Mexico. In *Healthcare* (Vol. 8, No. 2, p. 181). Multidisciplinary Digital Publishing Institute. <https://doi.org/10.3390/healthcare8020181> PMID: 32575622
57. Sun T., & Wang Y. (2020). Modeling COVID-19 epidemic in Heilongjiang province, China. *Chaos, Solitons & Fractals*, 138, 109949. <https://doi.org/10.1016/j.chaos.2020.109949> PMID: 32834579
58. Boccaletti S., Ditto W., Mindlin G., & Atangana A. (2020). Modeling and forecasting of epidemic spreading: The case of Covid-19 and beyond. *Chaos, solitons, and fractals*, 135, 109794. <https://doi.org/10.1016/j.chaos.2020.109794> PMID: 32288357
59. Ahmad A., Khan Y.A., Jiang C., Abbas S.A. (2020). The Impact of Corona virus on Unemployment rate: An Intelligent Base unemployment rate prediction in selected countries of Europe. *International Journal of Finance and Economics*. <https://doi.org/http%3A//dx.doi.org/10.1002/ijfe.2434>
60. Esposito C., Ficco M., & Gupta B. B. (2021). Blockchain-based authentication and authorization for smart city applications. *Information Processing & Management*, 58(2), 102468.
61. Tian Manwen, Yan Shurong, Tian Xiaoxiao, Zeng Ximei, Xie Chao. Financial Support to Marine Economy in the Big Data Era, 2019(9), *Journal. of Coastal Research*, 94:609–612 (2019).
